# Supplementary material
Source: ML conference proceedings conference paper supplement (https://openaccess.thecvf.com/content/CVPR2025/html/Sun_LayoutVLM_Differentiable_Optimization_CVPR_2025_paper.html)
Supplement: Supplementary file 1 [file Sun_LayoutVLM_Differentiable_Optimization_CVPR_2025_supplemental.pdf]

# LAYOUTVLM: Differentiable Optimization of 3D Layout via Vision-Language Models

## Supplementary Material

### A. Details of LAYOUTVLM

This section elaborates on the details of our method, including the prompts we used.

#### A.1. Grouping

To address the challenge of handling large numbers of 3D assets, we cluster related assets into groups using the following prompt:

```
You are an experienced 3D layout designer. You are teaching a junior designer the concept of semantic asset group. Understanding and recognizing semantic asset groups will help the designers to design a room layout more efficiently by decomposing the room layout into smaller, more manageable parts.
```

```
**Definition:**
```

```
A semantic asset group is a collection of assets that are logically related to each other. The grouping of the assets are based on functional, semantic, geometric, and functional relationships between assets.
```

```
Usually assets that are close to each other in space can be grouped together. For example, a bed, a nightstand, and a lamp on top of the nightstand can be grouped together.
```

```
However, it is also possible to group assets that are not physically close to each other but are semantically related. For example, a sofa, a tv console in front of the sofa, and a tv on top of the tv console can be grouped together even though the tv and the tv console is a few meters away from the sofa. They can be grouped together because they are semantically related -- the tv is in front of the sofa.
```

```
**Task:**
```

```
Now, given a 3D scene, you will use it as an example to teach the junior designer how to group assets into semantic asset groups.
```

```
**Step-by-Step Guide:**
```

1. You will first be provided a **list** of assets. Based on the assets, you should describe the general layout of the scene, the types of assets present, **and any** notable features.
2. You will identify the semantic relationships between the assets. You should consider the functional, semantic, **and** geometric relationships between the assets.
3. You will then describe how you would group the assets into semantic asset groups. You should explain the rationale behind each group **and** how the assets within each group are related to each other.
4. You will then order the semantic asset groups based on the sequence **in** which they should be placed **in** the scene. You should consider the significance of each group **and** the logical flow of the scene layout. For example, larger **or** more prominent assets may be placed first to establish the scenes focal points.
5. Finally, you will **format** the grouping

```
information into a clear and organized structure that can be easily understood by other designers or stakeholders.
```

```
**Example:**
```

```
Suppose you are examining a bedroom scene. In the bedroom, there are the following assets:
```

```
bed | ...  
nightstand | ...  
lamp | ...  
bed_bench | ...  
dresser-0 | ...  
dresser-1 | ...  
photo_frame-0 | ...  
dressing_table-0 | ...  
chair-0 | ...
```

1. After examining the scene, you will describe the scene a bedroom with a bed **and** a seating area **for** dressing.
2. You will **list** the assets **and** their relationships:
  - the bed **is** the central piece
  - the nightstand **is next** to the bed **for** placing items. The bedside table should be close to the bed **for** easy **access**.
  - the lamp **is** on the nightstand **for** lighting. The lamp should be close to the bed **for** reading.
  - the end of bed bench **is** at the foot of the bed. The bench **is** at the end of the bed **for** seating **or** placing items.
  - the dresser **is** on the other side of the room. The dresser **is** on the opposite side of the bed **for** storage.
  - the photo frame **is** on the dresser. The photo **is** directly opposite the bed **for** viewing.
  - the dressing table **is in** an **open** area of the room
  - the chair **is in** front of the dressing table **for** seating.
3. You will group the assets into semantic asset groups:
  - Group 1: Bed, Nightstand, Lamp. The rationale **is** that the bed **is** the central piece, the nightstand **is next** to the bed, **and** the lamp **is** on the nightstand. They are related to each other because they are used **for** sleeping **and** reading.
  - Group 2: End of bed bench. The bench **is** at the foot of the bed **for** seating **or** placing items.
  - Group 3: Dresser, Photo frame. The dresser **is** on the opposite side of the bed **for** storage, **and** the photo frame **is** directly opposite the bed **for** viewing.
  - Group 4: Dressing table, Chair. The dressing table **is in** an **open** area of the room, **and** the chair **is in** front of the dressing table **for** seating.
4. You will order the semantic asset groups based on the sequence **in** which they should be placed **in** the scene:
  - Group 1: Bed, Nightstand, Lamp. They should be placed first to establish the sleeping area. They are the focal point of the room.
  - Group 2: End of bed bench. It should be placed **next** to the bed to complement the sleeping area.
  - Group 3: Dresser, Photo frame. They should be placed on the opposite side of the room to

```

    balance the layout.
- Group 4: Dressing table, Chair. They should be
  placed in an open area of the room to create a
  dressing area.
5. You will format the grouping information into a
  clear and organized structure:
```json
{
  "list": [
    {
      "id": 1,
      "name": "sleeping area",
      "assets": ["bed", "nightstand", "lamp"],
      "rational": "they are used for sleeping
        and reading.",
      "key_relations_between_assets": ["the bed
        is the central piece", "the
        nightstand is next to the bed", "the
        lamp is on the nightstand"],
      "key_relations_with_other_groups": []
    },
    {
      "id": 2,
      "name": "seating area",
      "assets": ["bed_bench"],
      "rational": "this end of bed bench is at
        the foot of the bed for seating or
        placing items.",
      "key_relations_between_assets": [],
      "key_relations_with_other_groups": ["the
        bench complements the sleeping area."
      ]
    },
    {
      "id": 3,
      "name": "storage area",
      "assets": ["dresser-0", "dresser-1", "
        photo_frame-0"],
      "rational": "the dresser is on the
        opposite side of the bed for storage,
        and the photo frame is directly
        opposite the bed for viewing.",
      "key_relations_between_assets": ["the
        photo frame is on top of the dresser"
        ],
      "key_relations_with_other_groups": ["the
        dresser is for storage, and the photo
        frame is for viewing. To make the
        photo frame visible from the bed, the
        dresser should be placed on the
        opposite side of the bed."]
    },
    {
      "id": 4,
      "name": "dressing area",
      "assets": ["dressing_table-0", "chair-0"],
      "rational": "the dressing table is in an
        open area of the room, and the chair
        is in front of the dressing table for
        seating.",
      "key_relations_between_assets": ["the
        chair is in front of the dressing
        table"],
      "key_relations_with_other_groups": ["the
        dressing area complements the
        sleeping area and the storage area by
        providing another function in the
        room."]
    }
  ]
}

```

Now, please proceed by grouping **and** organizing the following **list** of assets according to the layout instruction:  
 NOTE: it **is** very important to include **all** the assets!!! And please do **not** change the name of the assets.

```

Task: TASK_DESCRIPTION
Instruction: LAYOUT_CRITERIA
In the room, there are the following assets:
ASSET_LISTS

```

## A.2. Differentiable Spatial constraint

We define differentiable objectives for the spatial constraints used in our method. We introduce the necessary notations and provide the mathematical formulations below. The pose of an asset  $m_i$  is represented as  $p_i = (x_i, y_i, z_i, \theta_i)$ , the orientation of the asset  $\theta_i$  is represented with an orientation vector  $\mathbf{v}_i = (\cos \theta_i, \sin \theta_i)$ , and  $b_i$  denotes the 3D bounding box size of the asset. Below are the mathematical objectives for various spatial relations.

### Distance Objective

$$\mathcal{L}_{\text{distance}}(p_i, p_j, d_{\min}, d_{\max}) = \text{clamp}(\min(\|p_i - p_j\| - d_{\min}, d_{\max} - \|pos_i - pos_j\|), 0, 1) \quad (3)$$

where  $\|pos_i - pos_j\| = \sqrt{(x_i - x_j)^2 + (y_i - y_j)^2}$  is the Euclidean distance between  $i$  and  $j$  in the x-y plane. The function  $\text{clamp}(x, a, b)$  constrains  $x$  to  $[a, b]$ , defined as  $\text{clamp}(x, a, b) = \min(\max(x, a), b)$ .

### On-Top-Of Objective

$$\mathcal{L}_{\text{on_top_of}}(p_i, p_j, b_i, b_j) = -\mathcal{L}_{\text{IoU}}(p_i, p_j, b_i, b_j). \quad (4)$$

where  $\text{IoU}(a, b)$  denotes the Intersection-over-Union of the bounding boxes of  $a$  and  $b$ . Instead of using a loss function for the z-axis, the On-Top-Of objective directly sets  $z_i$  the z-coordinate of the object  $i$  to be on top of the object  $j$ .

### Point-Towards Objective

$$\mathcal{L}_{\text{point_towards}}(p_i, p_j, \phi) = \begin{cases} 0, & \text{if } \mathbf{v}_i \cdot \mathbf{d}_{ij} > 0, \\ 1 - \frac{\mathbf{v}_i \cdot \mathbf{d}_{ij}}{\|\mathbf{v}_i\| \|\mathbf{d}_{ij}\|}, & \text{otherwise,} \end{cases} \quad (5)$$

where  $\mathbf{d}_{ij}$  is the direction vector from  $i$  to  $j$  rotated by  $\phi$  degree around the z-axis.

### Align-With Objective

$$\mathcal{L}_{\text{align_with}}(p_i, p_j, \phi) = 1 - \frac{\mathbf{v}_i \cdot \mathbf{v}_j}{\|\mathbf{v}_i\| \|\mathbf{v}_j\|}, \quad (6)$$

where  $\mathbf{v}_i$  and  $\mathbf{v}_j$  are the orientation vectors of  $i$  and  $j$ , respectively.

**Against-Wall Objective** The "Against-Wall" objective consists of two components: (a) the sum of distances from the object's corners to the wall, and (b) a term that encourages the object to point away from the wall. Let  $c_i^{(k)}$  be the  $k$ -th corner of the  $i$ -th object, which is calculated based on the object's  $x$ - $y$  position  $(x_i, y_i)$ , rotation, and bounding box size  $b_i$ . The loss function is:

$$\mathcal{L}_{\text{against\_wall}}(p_i, w_j, b_i) = \sum_{k=1}^4 \text{clamp}(\|c_i^{(k)} - w_j\|, 0, 1) + \left(1 - \frac{\mathbf{v}_i \cdot \mathbf{n}_{w_j}}{\|\mathbf{v}_i\| \|\mathbf{n}_{w_j}\|}\right), \quad (7)$$

where  $\|c_i^{(k)} - w_j\|$  denotes the Euclidean distance between the  $k$ -th corner of the object to the wall segment on the  $x$ - $y$  plane and  $\mathbf{n}_w$  denotes the normal vector of wall  $w$  (i.e., perpendicular to the wall).

**Optimization Details** We use Adam optimizer and Exponential LR scheduler with a decay factor 0.96. Each optimization runs for 400 steps with projection back to the boundary every 100 iterations. Optimizing a scene with 40 assets takes 1–5 minutes on a single GPU, 5-10 GPT-4o calls (i.e., one per group), varying based on the VLM-defined optimization problem.

Below is the prompt we feed VLM to generate spatial constraints.

You are an experienced layout designer that place 3D assets into a scene. Specify the asset placement using a Python-based DSL.

```
**3D Convention:**
- Right-handed coordinate system.
- The X-Y plane is the floor; the Z axis points up. The origin is at a corner, defining the global frame.
- Asset front faces point along the positive X axis. The Z axis points up. The local origin is centered in X-Y and at the bottom in Z. A [90] rotation means that the object will face the positive Y axis. The bounding box aligns with the assets local frame.
```

```
**DSL:**
```python
from pydantic import BaseModel, Field
from typing import List, Optional
```

```
class Wall(BaseModel):
    corner1: List[float] = Field(description="XY coordinates of first corner")
    corner2: List[float] = Field(description="XY coordinates of second corner")
```

```
class AssetInstance(BaseModel):
    position: Optional[List[float]] = Field(
        description="XYZ position", default=[0, 0, 0])
    rotation: List[float] = Field(description="counterclockwise rotation in degrees
```

```
around Z-axis.", default=[0])
```

```
class Assets(BaseModel):
    description: str = Field(description="Asset description")
    placements: List[AssetInstance] = Field(
        description="Instances of the 3D asset that will share the same shape and dimension.")
    size: Optional[List[float]] = Field(
        description="BBox size. Z-axis up. Assets front faces point along the positive X axis.")
```

```
class ConstraintSolver:
    def __init__(self):
        self.constraints = []

    def on_top_of(self, asset1: AssetInstance, asset2: AssetInstance):
        pass

    def against_wall(self, asset1: AssetInstance, wall: Wall):
        pass

    def distance_constraint(self, asset1: AssetInstance, asset2: AssetInstance, min_distance, max_distance, weight=1):
        pass

    def align_with(self, asset1: AssetInstance, asset2: AssetInstance, angle=0.):
        pass

    def point_towards(self, asset1: AssetInstance, asset2: AssetInstance, angle=0.):
        pass
```

```
solver = ConstraintSolver()
```
```

```
**Constraints:**
- Z-axis: on_top_of
- Planar: distance_constraint
- Orientation: align_with, point_towards
- Planar & Orientation: against_wall
- For constraints with multiple arguments, the order determines the constraint direction. For example, to update both assets placements with align_with, specify the constraint twice, swapping the arguments. For example, solver.point_towards(chair[0], sofa[0]) makes the chair point to the sofa, while solver.point_towards(sofa[0], chair[0]) adjusts the sofa to point to the chair.
```

```
**Task:**
You will receive:
1. High-level design goals.
2. A list of existing scene assets (if any).
3. A list of new assets with their dimensions and orientations.
4. A top-down view of the current scene, with a marked global frame, 1-meter grid, labeled assets, and front-facing orientation arrows. Walls are also labeled with orientation arrows.
5. A side view of the current scene, with the global frame and 1-meter grid.
6. A top-down view of each new asset in an empty scene, facing the positive X-axis, labeled with its name and front-facing arrow.
```

Your task **is** to write a program that:

```
1. Specifies precise position and rotation for the new asset placements.
```

2. Constraints **for** the asset placements. These constraints will ensure that the layout semantics are maintained when the layout **is** being adjusted to be physically feasible.

```

**Instructions:**
Follow these instructions carefully:
- Specify the constraints for all the assets to be placed, specifically for each asset instance in the placements list of the Assets class.
- Specify at least one planar constraint and one orientation constraint for each asset.
- Do not specify constraints for existing assets or walls.
- Do not re-initialize existing assets or walls.
- Do not hallucinate assets.
- Enclose your answer in the ``python `` code block. PLEASE DO NOT REPEAT THE GIVEN PROGRAM.
- Use code comments to explain your reasoning.
- Do not overwrite asset variable names (e.g., avoid for chair in sofa.placements: ...).
- It is important to find a empty space to place the new sets of assets given the

```

### A.3. Self-Consistent Decoding

We propose self-consistent decoding to address the challenge of maintaining layout coherence in VLM-generated spatial plans. Our main hypothesis is that preserving self-consistent spatial relations—those that align with the estimated numerical poses of objects—is essential for ensuring semantic and physical plausibility during optimization. During implementation, we simplify the decoding process by enforcing that each asset maintains at most one orientational constraint, either to “point towards” or “align with” another asset. Additionally, the spatial relation “on top of” is excluded from the self-consistency decoding, as we empirically observe that “on top of” relations are almost accurately and reasonably predicted by our model; thus, enforcing self-consistency is unnecessary.

### A.4. Annotating Unlabeled 3D Assets

We annotate the 3D assets used in a similar way as in Holodeck [5], using GPT-4o to determine the front face of the object and to determine the textual description of the asset. More specifically, GPT-4o takes a set of four images as inputs, each showing an object from orthogonal rotations (0°, 90°, 180°, and 270°) and outputs the following attributes for the 3D object:

- **Category:** a specific classification of the object, such as “chair”, “table”, “building”, etc.
- **Variable Name:** a string denoting the python variable name that will be used to refer to this object in our scene layout representation.
- **Front View:** an integer denoting the view representing the front of the object, often the most symmetrical view.
- **Description:** a detailed textual description of the object.
- **Materials:** a list of materials constituting the object.
- **Placement Attributes:** Boolean values (ONCEILING, ONWALL, ONFLOOR, ONOBJECT) indicating typical place-

ment locations. For example, “True” for a ceiling fan’s placement on the ceiling.

### A.5. Finetuning VLMs with Scene Datasets

This scene representation can be automatically extracted from scene layout datasets without requiring manual annotations. Specifically, given a set of posed objects in a 3D scene, we apply the preprocessing procedure outlined in Section 3 to obtain both textual descriptions and oriented bounding boxes for each object. After canonicalizing the objects, we compute cost values for our defined spatial relations based on the ground-truth positions and orientations of the objects, using heuristic thresholds to determine whether each spatial relation is satisfied. The resulting scene representation includes both raw object poses and the satisfied spatial relations, which we then use to fine-tune VLMs to generate these scene representations from input objects and scene renderings. In our implementation, we use the 3D-Front dataset to extract training data for around 9000 rooms. Our approach is capable of identifying layout patterns in 3D scenes, such as a variable number of chairs around a table, nightstands positioned beside a bed, or an entertainment area comprising a TV, coffee table, and sofa. We investigate fine-tuning two VLMs for the layout generation task: the closed-source *GPT-4o* [29] and the open-source *LLaVA-NeXT-Interleave* [35].

## B. Details of our Experiments

### B.1. Generating Test Cases

We developed a pipeline for generating valid open-vocabulary 3D layout generation cases to benchmark our method against existing methods.

First, we feed the following prompt to GPT-4o to generate a layout instruction given the room type:

```

Given a task description, return a string
description of layout criteria for an interior
design focused on the provided task.
Include considerations for aesthetics,
functionality, and spatial organization. Each
layout criteria string should start with
the phrase "The layout criteria should follow the
task description and be...".

For example, if the task description is a spacious
study room, the layout criteria should be:
"The layout criteria should follow the task
description and be spacious, tidy, and minimal
"

task description: TASK_DESCRIPTION

Return only the layout criteria and nothing else.
Ensure that the criteria is
no longer than 1-2 sentences. It is extremely
important.

```

Condition on the generated room layout instruction, we then use the following prompt to retrieve a bunch of plausible assets:



Given a client's description of a room or tabletop and the floor vertices of the room, determine what objects and how many of them should be placed in this room or table.

Objects should follow the requirements below.

Requirement 1: Be specific about how you describe the objects, while using as simple english as possible. Each object should try to be around two words, including a relevant adjective if possible. Normally this adjective should be the room type, such as "kitchen scale" or "bathroom sink". However, it can also be a color or a material, such as "wooden chair" or "red table" if necessary. Ensure that descriptions are simple - an elementary student should understand what each object is.

For example, if a client description asks for "weightlifting racks", simplify the description to "weightlifting equipment".

For example, if a client description asks for "a 1980's jukebox", simplify the description to "vintage jukebox".

For example, if a client description includes "aerobic machines", simplify the description to "treadmill" and "exercise bike".

For example, if a client is describing a kitchen and is asking for a "scale" for food, ensure the object includes an adjective to describe the object, such as "kitchen scale".

For example, if a client is describing a bathroom and is asking for a "sink", ensure the object includes an adjective to describe the object, such as "bathroom sink".

Requirement 2: Only choose objects that are singular in nature.

For example, instead of choosing a "speaker system", just choose "speaker".

For example, Instead of choosing "tables" and "chairs", just choose "table" and "chair".

Requirement 3: Ensure that the objects are relevant to the room or tabletop.

A client's description can either describe a room or tabletop arrangement. If it is describing a tabletop arrangement, do not include objects like "table" or "chair" in the response. Only include objects that would be placed on the table.

If it is describing a room arrangement, do not describe include things like "windows" or "doors" in the response.

Only include objects that would be placed in the room. Other than paintings, posters, light fixtures, or shelves, do not include objects that would be placed on the wall.

Requirement 4: Ensure that rooms have a place to sit and a place to put things down, like a counter, table, or nightstand.

This also means that objects like art easels, work benches, or desks should have corresponding chairs or stools.

For example, if a client is describing a bar, ensure that the response includes a "bar table" or "counter" and "bar stools" as well.

For example, if a client describes a classroom, ensure that all desks have corresponding

chairs.

Requirement 5: Try and include as many objects as possible that are relevant to the room or tabletop. Aim for at least 10 objects in each response, but ideally include more.

After ensuring these requirements, return a dictionary objects, where the key is the object name and the value is an array tuple of two values.

The first value of the key array is the number of times that object should occur in the room and the second value is how many types of that object should exist.

For example, for a given description of a garden, you would want many plants, but do not want all of them to be the same type.

Thus, the value of the key array would be [9, 3] for the object "plant". This means that there should be 9 plants in the garden and there should be 3 different types of ferns in the garden.

For example, for a given description of "A study room 5m x 5m"

Return the Dictionary: {"desk": [1, 1], "chair": [1, 1], "lamp": [1, 1], "bookcase": [2, 1], "laptop\_computer": [1, 1], "computer monitor": [1, 1], "printer": [1, 1], "sofa": [1, 1], "flowerpot": [1, 1], "painting": [1, 1]}

For example, for a given description of "A tabletop arrangement with a bowl placed on a plate 1m x 1m"

Return the Dictionary: {"plate": [1, 1], "bowl": [1, 1], "fork": [1, 1], "knife": [1, 1], "spoon": [1, 1], "napkin": [1, 1], "salt shaker": [1, 1], "pepper shaker": [1, 1], "wine glass": [1, 1], "water glass": [1, 1]}

For example, for a given description of "a vibrant game room filled with vintage arcade games and a jukebox, 6m x 6m"

Return the Dictionary: {"jukebox": [1, 1], "arcade machine": [3, 1], "pool table": [1, 1], "darts board": [1, 1], "bar stool": [4, 1], "bar table": [1, 1], "neon sign": [1, 1], "popcorn machine": [1, 1], "vending machine": [1, 1], "air hockey table": [1, 1]}

For example, for a given description of "a lush inside garden filled with a variety of plants and a small birdbath, 5m x 3m"

Return the Dictionary: {"fern": [8, 3], "birdbath": [1, 1], "flowerpot": [3, 1], "watering can": [1, 1], "garden gnome": [1, 1], "garden bench": [1, 1], "garden shovel": [1, 1], "garden rake": [1, 1], "garden hose": [1, 1]}

task description: TASK\_DESCRIPTION  
layout criteria: LAYOUT\_CRITERIA  
room size in meters: ROOM\_SIZE

Remember, you should only include objects that are most important to be placed in the room or on the table.

The dictionary should not include the room dimensions.

Return only the dictionary of objects and nothing else. It is extremely important.

Subsequently, we embed the generated asset descriptions using CLIP [36] and use the embeddings to retrieve 3D assets

from Objaverse. The following prompt is employed to verify whether the retrieved object belongs to the given room:

```
You are an interior designer. A client is
suggesting possible objects that he thinks
belongs in a described
room. You are tasked with determining if the client
is correct or not, stating whether the
proposed object
belongs in the described room.

Given a client's description of a room or tabletop,
the description of an object, and images of
the object,
determine if the described object should be placed
in the room that is described. To help, you
are also
given a description of what object the client was
initially looking for. Ensure that the style
and color
of the object matches the type of the room. If an
object is not in the style of what the room
type
would typically have, it should not be placed in
the room.

Return "True" if the object should be kept in the
room and "False" if the object should not be.

For example, if the room description is a "A
tabletop arrangement with a bowl placed on a
plate 1m x 1m" and the object appears to be "a
shovel":
Return: False

For example, if the room description is a "A
spacious study room with a desk and chair" and
the object appears to be "an 18th century
book":
Return: True

For example, for a given description of "a vibrant
game room filled with vintage arcade games and
a jukebox, 6m x 6m" and the object appears to
be "a 1980s pinball machine":
Return: True

For example, for a given description of an "art
room with chairs", and the object appears to
be a "a pink beach chair":
Return: False

task description: TASK_DESCRIPTION
layout criteria: LAYOUT_CRITERIA
object description: OBJECT_DESCRIPTION
object client requested: OBJECT_LOOKING_FOR

Remember, you should only return "True" if the
object should be placed in the room / tabletop
and "False" if the object should not be.
Do not include any other words in your response. It
is extremely important.
```

At last, we conduct many verifications to remove assets that humans deem unsuitable given the room type and layout instruction (e.g., a 3D asset of an entire city should not appear in an indoor scene).

## B.2. Evaluation

Evaluating the quality of generated 3D layouts requires metrics that measure both physical plausibility and semantic coherence. In this section, we introduce the evaluation prompts

we feed to VLM to assess the performance of layout generation systems.

We measure the positional and rotational *Semantic coherency* score with the following prompts.

```
You are an interior designer.
Given generated renderings of a room, your job is
to evaluate how well an
automated 3D layout generator does.

The instruction given to the 3D layout generator
was:

Evaluate the 3D layout generator as follows:
Assess the the relative position (do not consider
orientation) between assets: determine if
related objects are placed near each other in
a way that makes sense for their use.
- Scoring Criteria for Position:
100-81: Excellently Positioned - Related
objects are positioned near each other
perfectly, facilitating their combined use
.
80-61: Well Positioned - Most related objects
are logically placed near each other, with
few exceptions.
60-41: Adequately Positioned - Some related
objects are not optimally placed,
impacting their use together.
40-21: Poorly Positioned - Many related objects
are placed far apart, hindering their
joint use.
20-1: Very Poorly Positioned - Related objects
are placed without consideration for their
relationship, severely affecting
functionality.

Please assess the image based on how coherently its
layout aligns with the given target criteria.
Please provide justification and explanation for
the score you give, in detail.
Always end your answer with "### my final rating is
: [replace this with a number between 1-100]".
This is extremely important.
```

```
You are an interior designer.
Given generated renderings of a room, your job is
to evaluate how well an
automated 3D layout generator does.

The instruction given to the 3D layout generator
was:

Evaluate the 3D layout generator as follows:
Assess the coherency of asset orientation: Evaluate
if related objects are oriented relative to
each other in a way that makes sense for their
use.
- Scoring Criteria for Orientation:
100-81: Excellently Oriented - The orientation
of objects perfectly complements their use
and relationship with each other.
80-61: Properly Oriented - Most objects are
oriented sensibly relative to each other,
with minor misalignments.
60-41: Adequately Oriented - Several objects
have orientations that do not fully
support their use or relation.
40-21: Poorly Oriented - Many objects are
oriented in ways that detract from their
functionality or relation.
20-1: Very Poorly Oriented - Objects are
```

oriented without **any** apparent logic, severely undermining their intended use **and** relationship.

Please assess the image based on how coherently its layout aligns with the given target criteria. Please provide justification **and** explanation **for** the score you give, **in** detail. Always end your answer with "### my final rating is : [replace this with a number between 1-100]". This **is** extremely important.

We measure the *Physically-grounded Semantic Alignment Score (PSA)* with *Collision-Free Score (CF)*, *In-Boundary Score (IB)*, and the overall prompt alignment score following prompt.

You are an interior designer.  
Given generated renderings of a room, your job **is** to evaluate how well an automated 3D layout generator does.

The instruction given to the 3D layout generator was:

Evaluate the 3D layout generator as follows:  
Layout criteria match: On a scale of 1 to 100, how well does the layout (i.e. just the layout **not** the assets) capture the essence of the specified layout criteria?  
- Scoring Criteria:  
100: Excellent: The layout of the scene (i.e. relative position **and** pose of objects **in** the scene) align very well with the criteria.  
80: Good: The layout of the scene mostly align with the criteria (only ~10% assets do **not** ).  
60: Ok: The layout of the scene somewhat align well with the criteria (only ~30% assets do **not** ).  
40: Poor: The layout of the scene (over ~50% of the assets) do **not** align with the criteria.  
20: Very Poor: The layout of the whole scene does **not** capture the target criteria at **all**.

Please assess the image based on how coherently its layout aligns with the given target criteria. Please provide justification **and** explanation **for** the score you give, **in** detail. Always end your answer with "### my final rating is : [replace this with a number between 1-100]". This **is** extremely important.

### B.3. Human Eval to validate our metrics

We follow our baseline I-Design, evaluating layouts using physical plausibility metrics and GPT-4o-rated scores. To further evaluate the alignment between GPT-4o ratings and human ratings, we conducted a user study. Following prior work [34], we recruited five graduate students to rank the methods based on position, orientation, and overall performance. They were given the same instructions used as prompts for the GPT-4o evaluator. We collected 495 ratings for each method and metric pair. We converted GPT-4o scores to rankings and computed Kendall’s Tau [37] in Table 6, showing **strong user-user agreement and user-GPT**

|           | User     |          |             | GPT-4o   |          |             |
|-----------|----------|----------|-------------|----------|----------|-------------|
|           | Position | Rotation | PSA         | Position | Rotation | PSA         |
| LayoutGPT | 1.91     | 1.86     | 2.77        | 2.00     | 1.82     | 2.83        |
| Holodeck  | 3.44     | 3.50     | 3.10        | 3.20     | 3.43     | 3.10        |
| I-Design  | 2.86     | 2.91     | 2.64        | 2.89     | 2.86     | 2.62        |
| LAYOUTVLM | 1.79     | 1.73     | <b>1.50</b> | 1.91     | 1.89     | <b>1.45</b> |

Table 5. Average ranks based on user ratings and GPT4-o scores.

|                  | Position | Rotation | PSA  |
|------------------|----------|----------|------|
| Within Users     | 0.51     | 0.57     | 0.50 |
| Users With GP4-o | 0.49     | 0.61     | 0.46 |

Table 6. User-User and User-GPT4o Alignment/Agreement

**agreement.** Table 5 reports the average rankings based on user and GPT-4o ratings, demonstrating **strong correlation with the results in our proposed metrics.**

### C. More Qualitative Comparison

We provide a qualitative example of LAYOUTVLM with and without self-consistency loss in Figure 6

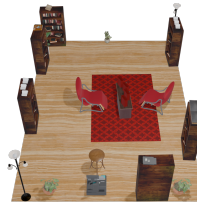

(a) LAYOUTVLM

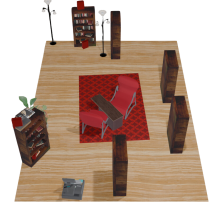

(b) w/o self-consistency decoding

Figure 6. Comparison when w/ and w/o self-consistency decoding.

In Figure 7, we present more qualitative examples of layouts generated by LAYOUTVLM and baseline methods. LAYOUTVLM consistently outperforms baseline methods across all room types in terms of both physical plausibility and semantic coherency. In the Living Room example, LAYOUTVLM excels in identifying semantic asset group by clustering sofa and table together. By leveraging spatial reasoning from VLMs, we are able to stack assets together, as shown in the Deli example.

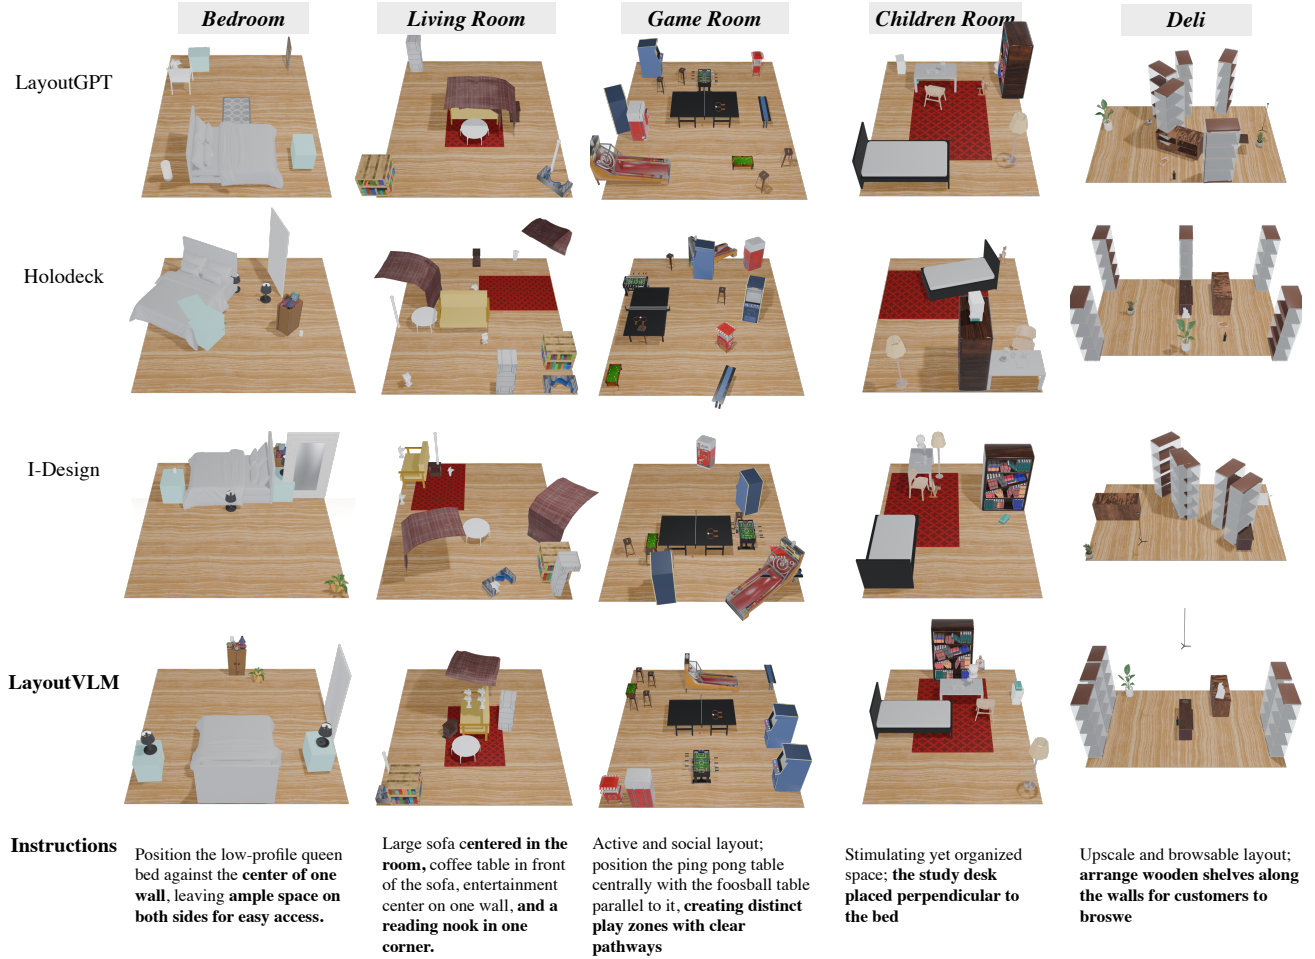

Figure 7. More qualitative comparison with baseline methods in generating layouts based on detailed language instructions.
